# Supplementary material for: Folded three-dimensional graphene with uniformly distributed mesopores for high-performance supercapacitors
Source: Royal Society of Chemistry journal article supplement (doi:10.1039/c5ra02991k), 2015-01-01
Supplement: c5ra02991k1.pdf [file c5ra02991k1.pdf]

Folded three-dimensional graphene with uniformly distributed mesopores for high-performance supercapacitors

Tao GAO<sup>\*1</sup>, Weijian XU<sup>\*2</sup>, Laijiang GONG<sup>3</sup>, Zhao WANG<sup>4</sup>, Zhongkui YANG<sup>5</sup>, Yawei SONG<sup>6</sup>, Yuanqin XIONG<sup>7</sup>

Institute of Polymer Science and Engineering, College of Chemistry and Chemical Engineering, Hunan University, Changsha, 410082, P. R. China.

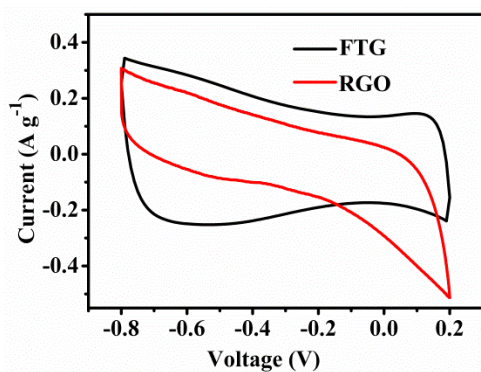

Fig. S1 CV curves of FTG and RGO at a scan rate of 1 mV s<sup>-1</sup>.

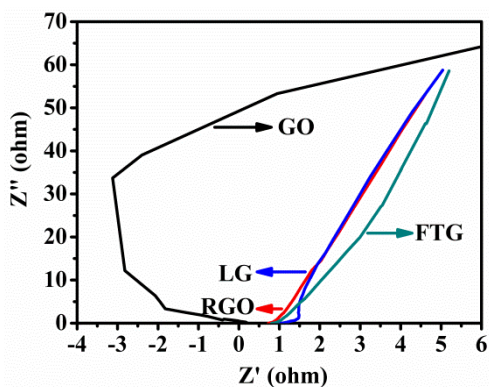

Fig. S2 EIS studies of GO, RGO, LG and FTG.

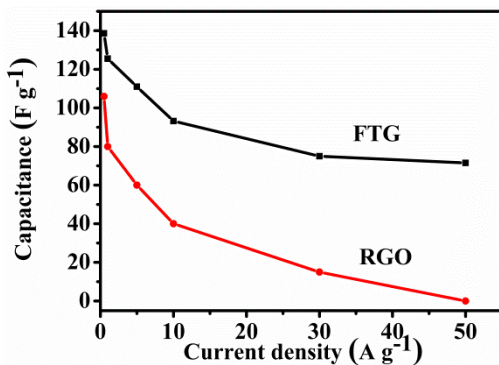

Fig. S3 Rate studies of RGO and FTG.
